# Supplementary material for: Developing a predictive nomogram and web-based survival calculator for Locally Advanced hypopharyngeal cancer: A Propensity Score-Adjusted, Population-Based Study
Source: Research Square preprint supplement (doi:10.21203/rs.3.rs-2038028/v1), 2022-09-12
Supplement: Supplementary file 1 [file b2df7a75e7cfb7432fae80d0.docx]

**Supplemental Online Content**

Supplementary Figure 1. Screening criteria for treatment modalities.

Supplementary Figure 2. Kaplan-Meier Survival Curves for OS in the total sample.

Supplementary Figure 3. Kaplan-Meier Survival Curves for CSS in the total sample.

Supplementary Figure 4. The calibration curves predicting 3-, and 5-year CSS in Training group and Validation group.

Supplementary Figure 5. The nomogram and the AJCC stage of the Receiver operating characteristic curve analysis and the Decision curve analysis in the prediction of CSS.

Supplementary Figure 6. Differences in OS and CSS by treatment modality based on age.

Supplementary Table 1. Characteristics of the 276 HSCC patients in the external validation group.

Supplementary Table 2. Univariate and multivariate analyses of cancer-specific survival in the training group.

Supplementary Table 3. Comparison of C-index between Nomogran model and AJCC staging.

Supplementary Table 4.Propensity-matched score analysis of Surgical-based vs Radiotherapy-based therapy.

Supplementary Table 5. Propensity-matched score analysis of RT vs RCT.


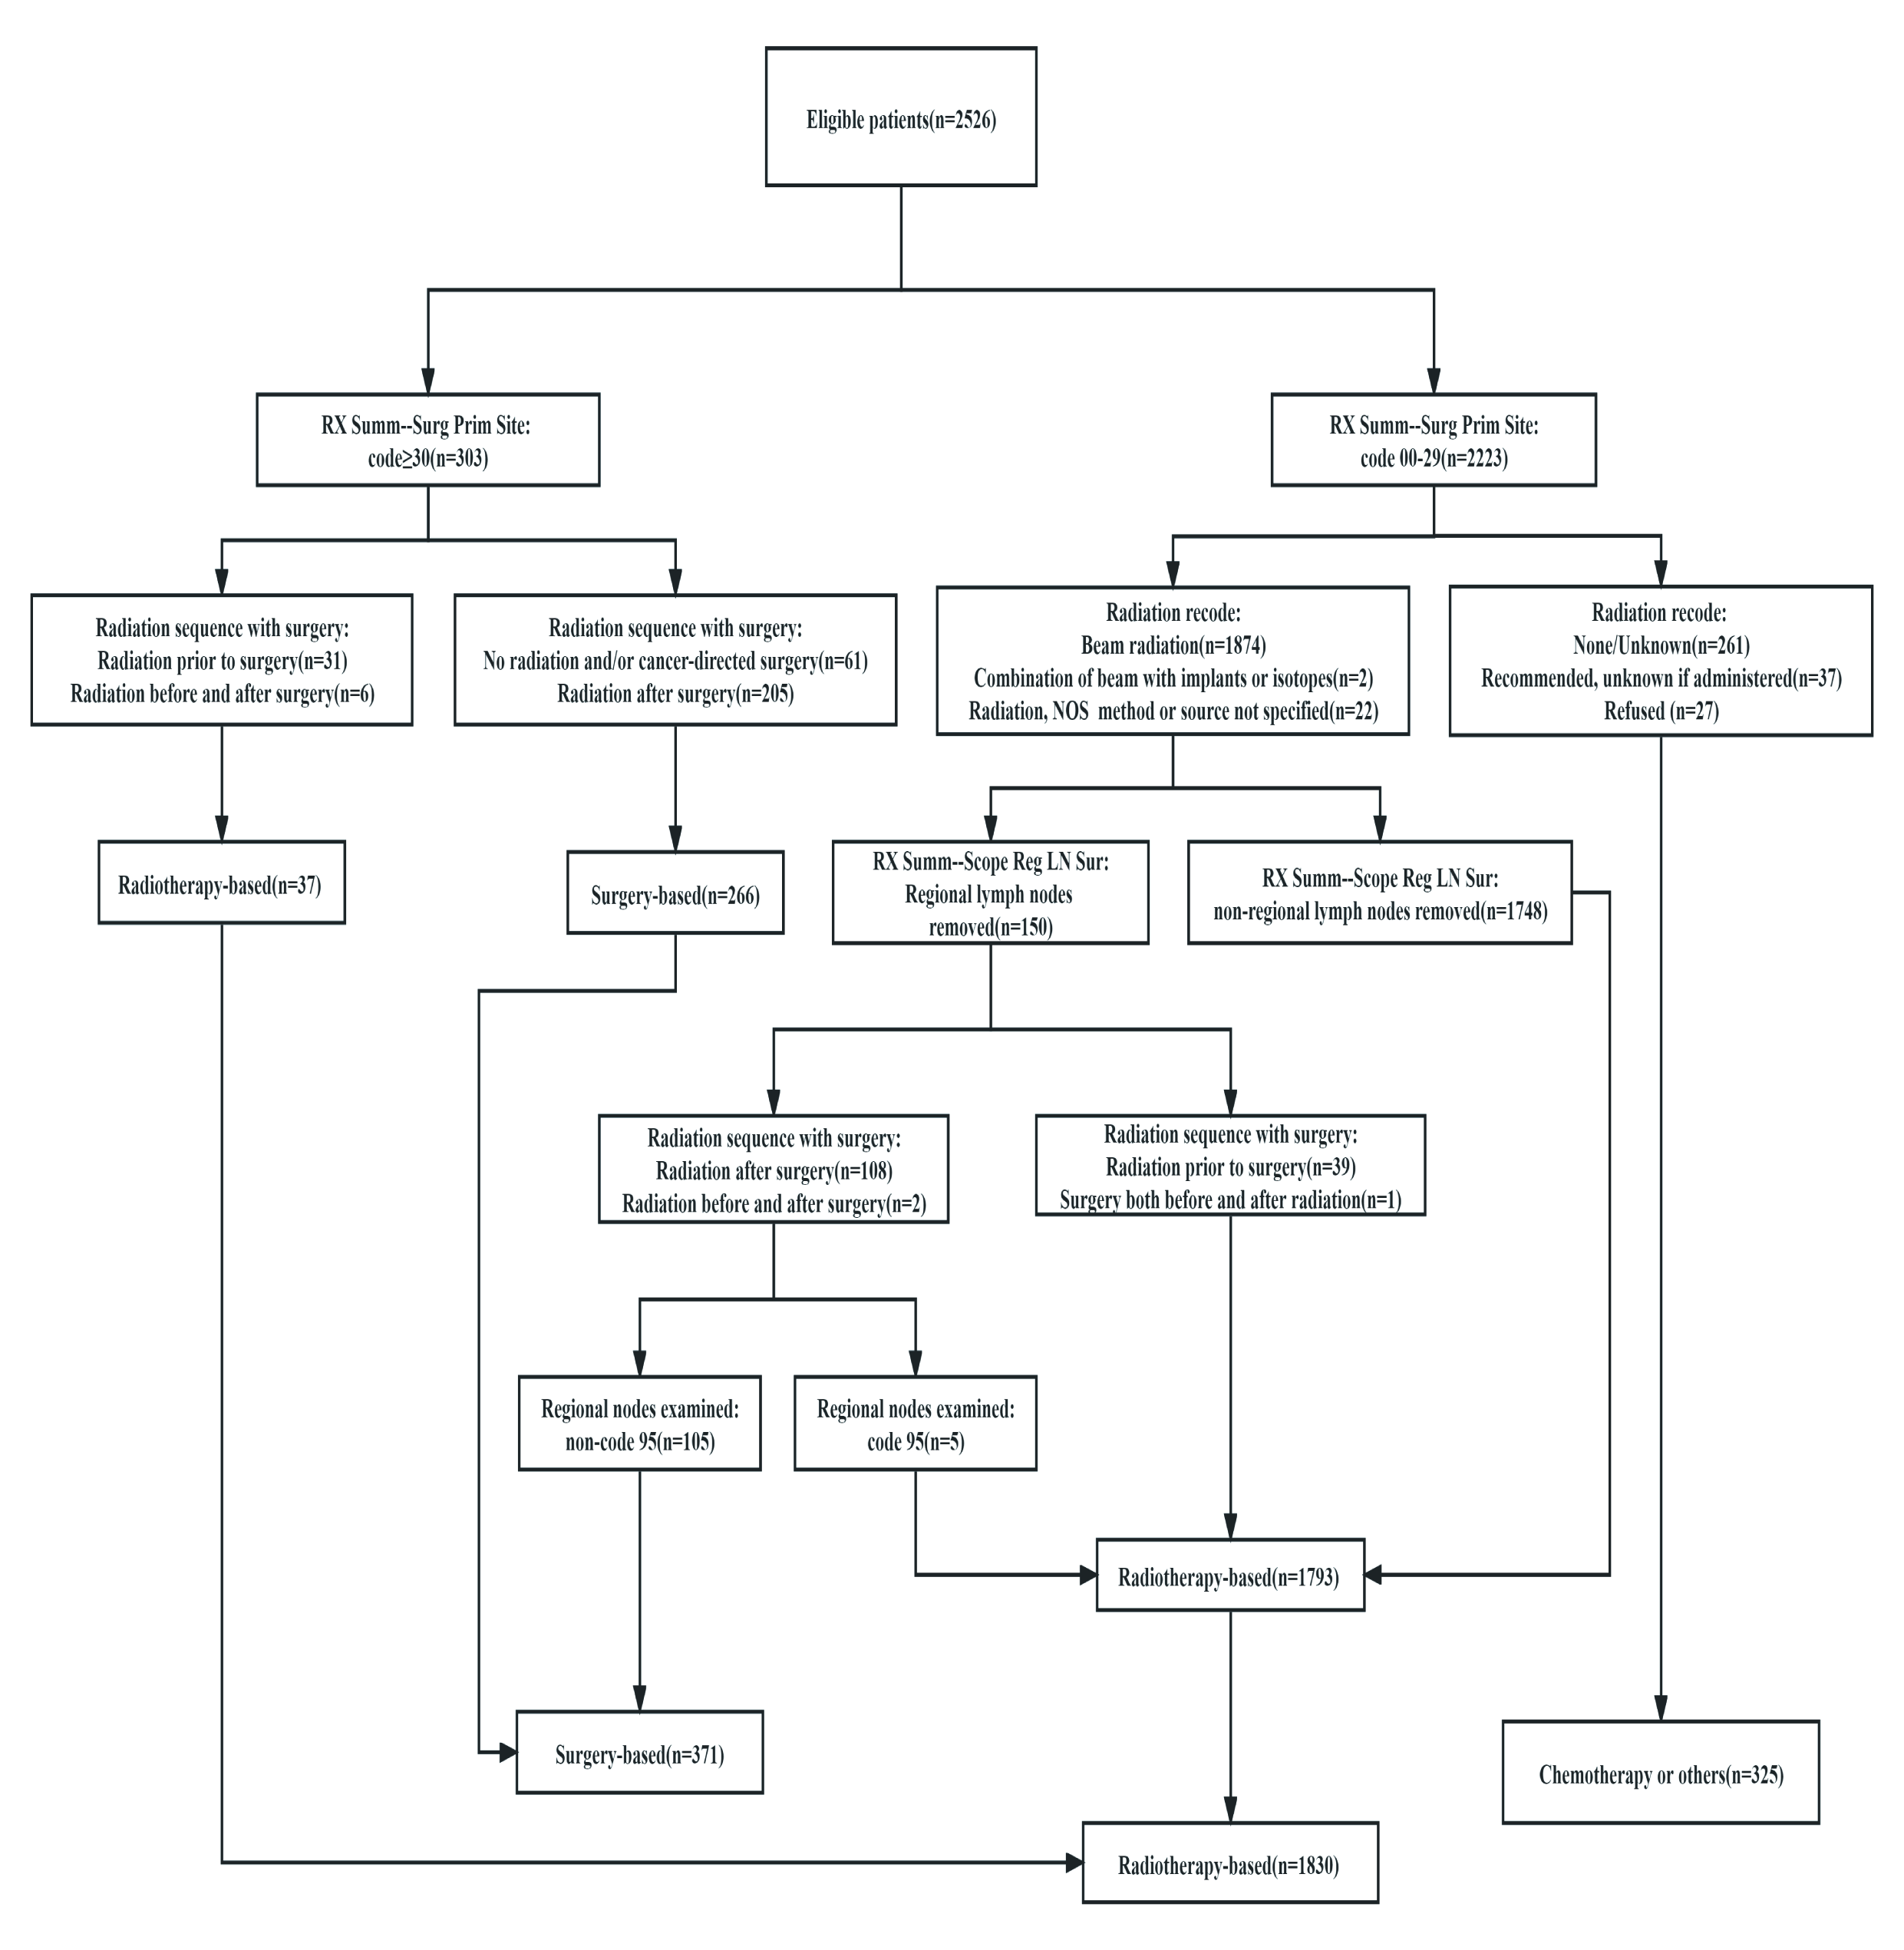


Supplementary Figure 1. Screening criteria for treatment modalities

Supplementary Table 1.Characteristics of the 276 LA-HPSCC patients in the external validation group.

| **Characteristics** | **External validation group (n=276)**  **no.(%)** |
| --- | --- |
| **Median follow-up time（Months）** | 81(64.3-97.6) |
| **Age** |  |
| <65 | 164(59.4%) |
| 65-75 | 96(34.8%) |
| 76-85 | 16(5.8%) |
| >85 | 0(0%) |
| **Gender** |  |
| Female | 15(5.4%) |
| Male | 261(94.6%) |
| **Race** |  |
| White | 0(0%) |
| Others | 276(100%) |
| Black | 0(0%) |
| **Insurance** |  |
| Yes | 276(100%) |
| No/Unknown | 0(0%) |
| **Marital status** |  |
| Married | 276(97.1%) |
| Others | 8(2.9%) |
| **Primary site** |  |
| Pyriform sinus | 179(64.8%) |
| Postcricoid region | 9(3.2%) |
| Aryepiglottic fold | 16(5.8%) |
| Posterior wall | 62(22.6%) |
| Overlapping lesion | 10(3.6%) |
| NOS | 0(0%) |
| **Pathological grade** |  |
| I-II | 135(48.9%) |
| III-IV | 131(47.5%) |
| Unknown | 10(3.6%) |
| **T stage** |  |
| T1 | 15(5.4%) |
| T2 | 63(22.8%) |
| T3 | 68(24.6%) |
| T4a | 62(22.6%) |
| T4b | 68(24.6%) |
| **N stage** |  |
| N0 | 24(8.7%) |
| N1 | 55(19.9%) |
| N2 | 150(54.3%) |
| N3 | 47(17.1%) |

| **AJCC stage** |  |
| --- | --- |
| III | 46(16.7%) |
| IVa | 124(44.9%) |
| IVb | 106(38.4%) |
| **Treatments** |  |
| Surgery-based | 36(13.1%) |
| Radiotherapy-based | 124(44.9%) |
| Chemotherapy or others | 116(42.0%) |

Supplementary Table 2.Univariate and multivariate analyses of cancer-specific survival in the training group.

| Variable | Univariate analysis | | Multivariate analysis | |
| --- | --- | --- | --- | --- |
| HR（95%CI） | *P value* | HR（95%CI） | *P value* |
| **Age** |  |  |  |  |
| <65 | 1.0 |  |  |  |
| 65-75 | 1.166(1.010-1.346) | 0.037 | 1.373(1.185-1.591) | <0.001 |
| 76-85 | 1.779(1.488-2.127) | <0.001 | 2.163(1.798-2.601) | <0.001 |
| >85 | 2.800(1.888-4.152) | <0.001 | 3.417(2.283-5.112) | <0.001 |
| **Gender** |  |  |  |  |
| Female | 1.0 |  |  |  |
| Male | 0.986（0.840-1.158） | 0.864 |  |  |
| **Race** |  |  |  |  |
| White | 1.0 |  |  |  |
| Others | 0.939（0.731-1.206） | 0.621 | 0.808（0.625-1.044） | 0.104 |
| Black | 2.042（1.765-2.363） | <0.001 | 1.792（1.541-2.083） | <0.001 |
| **Insurance** |  |  |  |  |
| Yes | 1.0 |  |  |  |
| No/Unknown | 1.367（1.202-1.554） | <0.001 | 1.387（1.217-1.581） | <0.001 |
| **Marital status** |  |  |  |  |
| Married | 1.0 |  |  |  |
| Others | 1.375（1.213-1.559） | <0.001 | 1.198（1.053-1.364） | <0.001 |
| **Primary site** |  |  |  |  |
| Pyriform sinus | 1.0 |  |  |  |
| Postcricoid region | 1.194（0.793-1.797） | 0.395 | 1.232（0.813-1.868） | 0.324 |
| Aryepiglottic fold | 1.118（0.834-1.442） | 0.184 | 0.774（0.566-1.059） | 0.109 |
| Posterior wall | 1.172（1.019-1.347） | 0.026 | 1.213（0.920-1.599） | 0.172 |
| Overlapping lesion | 1.274（0.940-1.726） | 0.118 | 1.183（0.871-1.607） | 0.282 |
| NOS | 1.113（0.847-1.461） | 0.442 | 1.034（0.897-1.191） | 0.647 |
| **Pathological grade** |  |  |  |  |
| I-II | 1.0 |  |  |  |
| III-IV | 1.004（0.875-1.152） | 0.960 |  |  |
| Unknown | 0.887（0.754-1.045） | 0.151 |  |  |
| **T stage** |  |  |  |  |
| T1 | 1.0 |  |  |  |
| T2 | 1.822（1.314-2.527） | <0.001 | 1.818（1.305-2.531） | <0.001 |
| T3 | 2.555（1.846-3.537） | <0.001 | 3.072（2.200-4.289） | <0.001 |
| T4a | 2.948（2.138-4.067） | <0.001 | 3.305（2.377-4.596） | <0.001 |
| T4b | 4.000（2.832-5.651） | <0.001 | 3.642（2.554-5.195） | <0.001 |
| **N stage** |  |  |  |  |
| N0 | 1.0 |  |  |  |
| N1 | 1.424（1.132-1.791） | 0.003 | 1.993（1.562-2.543） | <0.001 |
| N2 | 1.627（1.322-2.002） | <0.001 | 2.338（1.879-2.910） | <0.001 |
| N3 | 2.400（1.794-3.210） | <0.001 | 3.375（2.460-4.631） | <0.001 |
| **AJCC stage** |  |  |  |  |
| III | 1.0 |  |  |  |
| IVa | 1.530（1.300-1.801） | <0.001 |  |  |
| IVb | 2.068（1.687-2.535） | <0.001 |  |  |
| **Treatments** |  |  |  |  |
| Surgery-based | 1.0 |  |  |  |
| Radiotherapy-based | 1.273（1.056-1.534） | 0.011 | 1.227（1.015-1.484） | 0.034 |
| Chemotherapy or others | 3.471（2.762-4.361） | <0.001 | 3.707（2.932-4.687） | <0.001 |


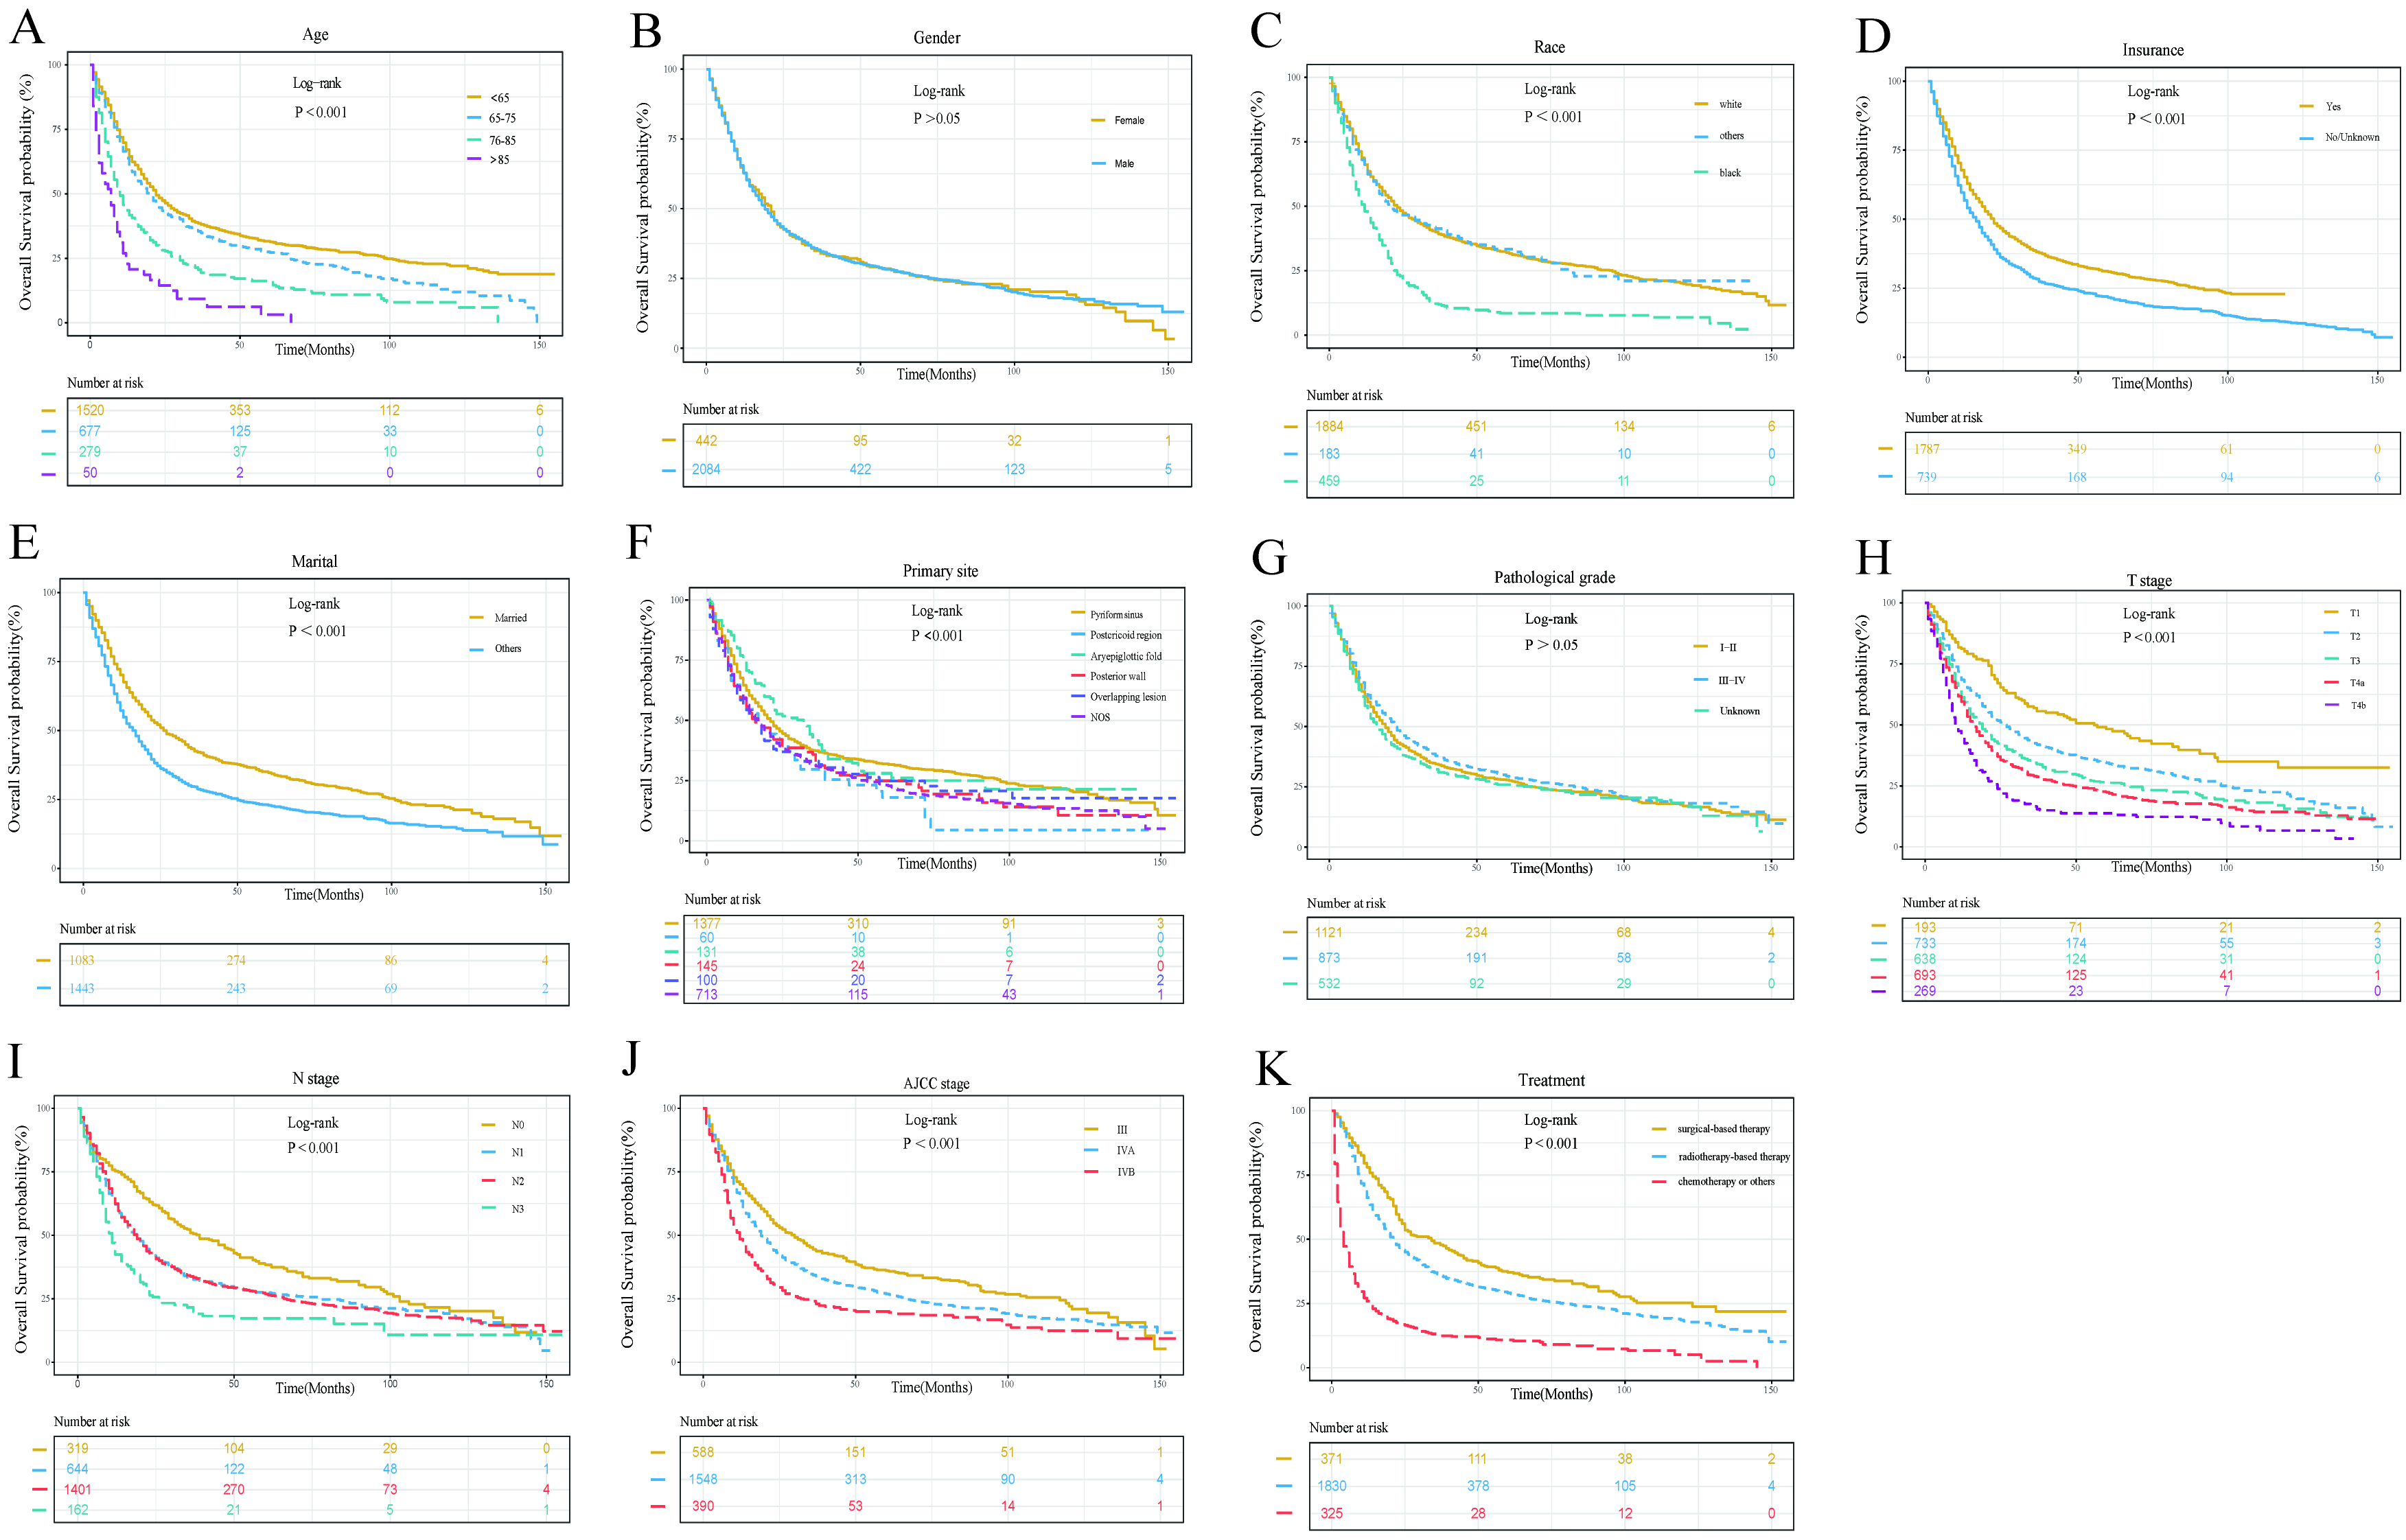


Supplementary Figure 2. Kaplan-Meier Survival Curves for OS in the total sample


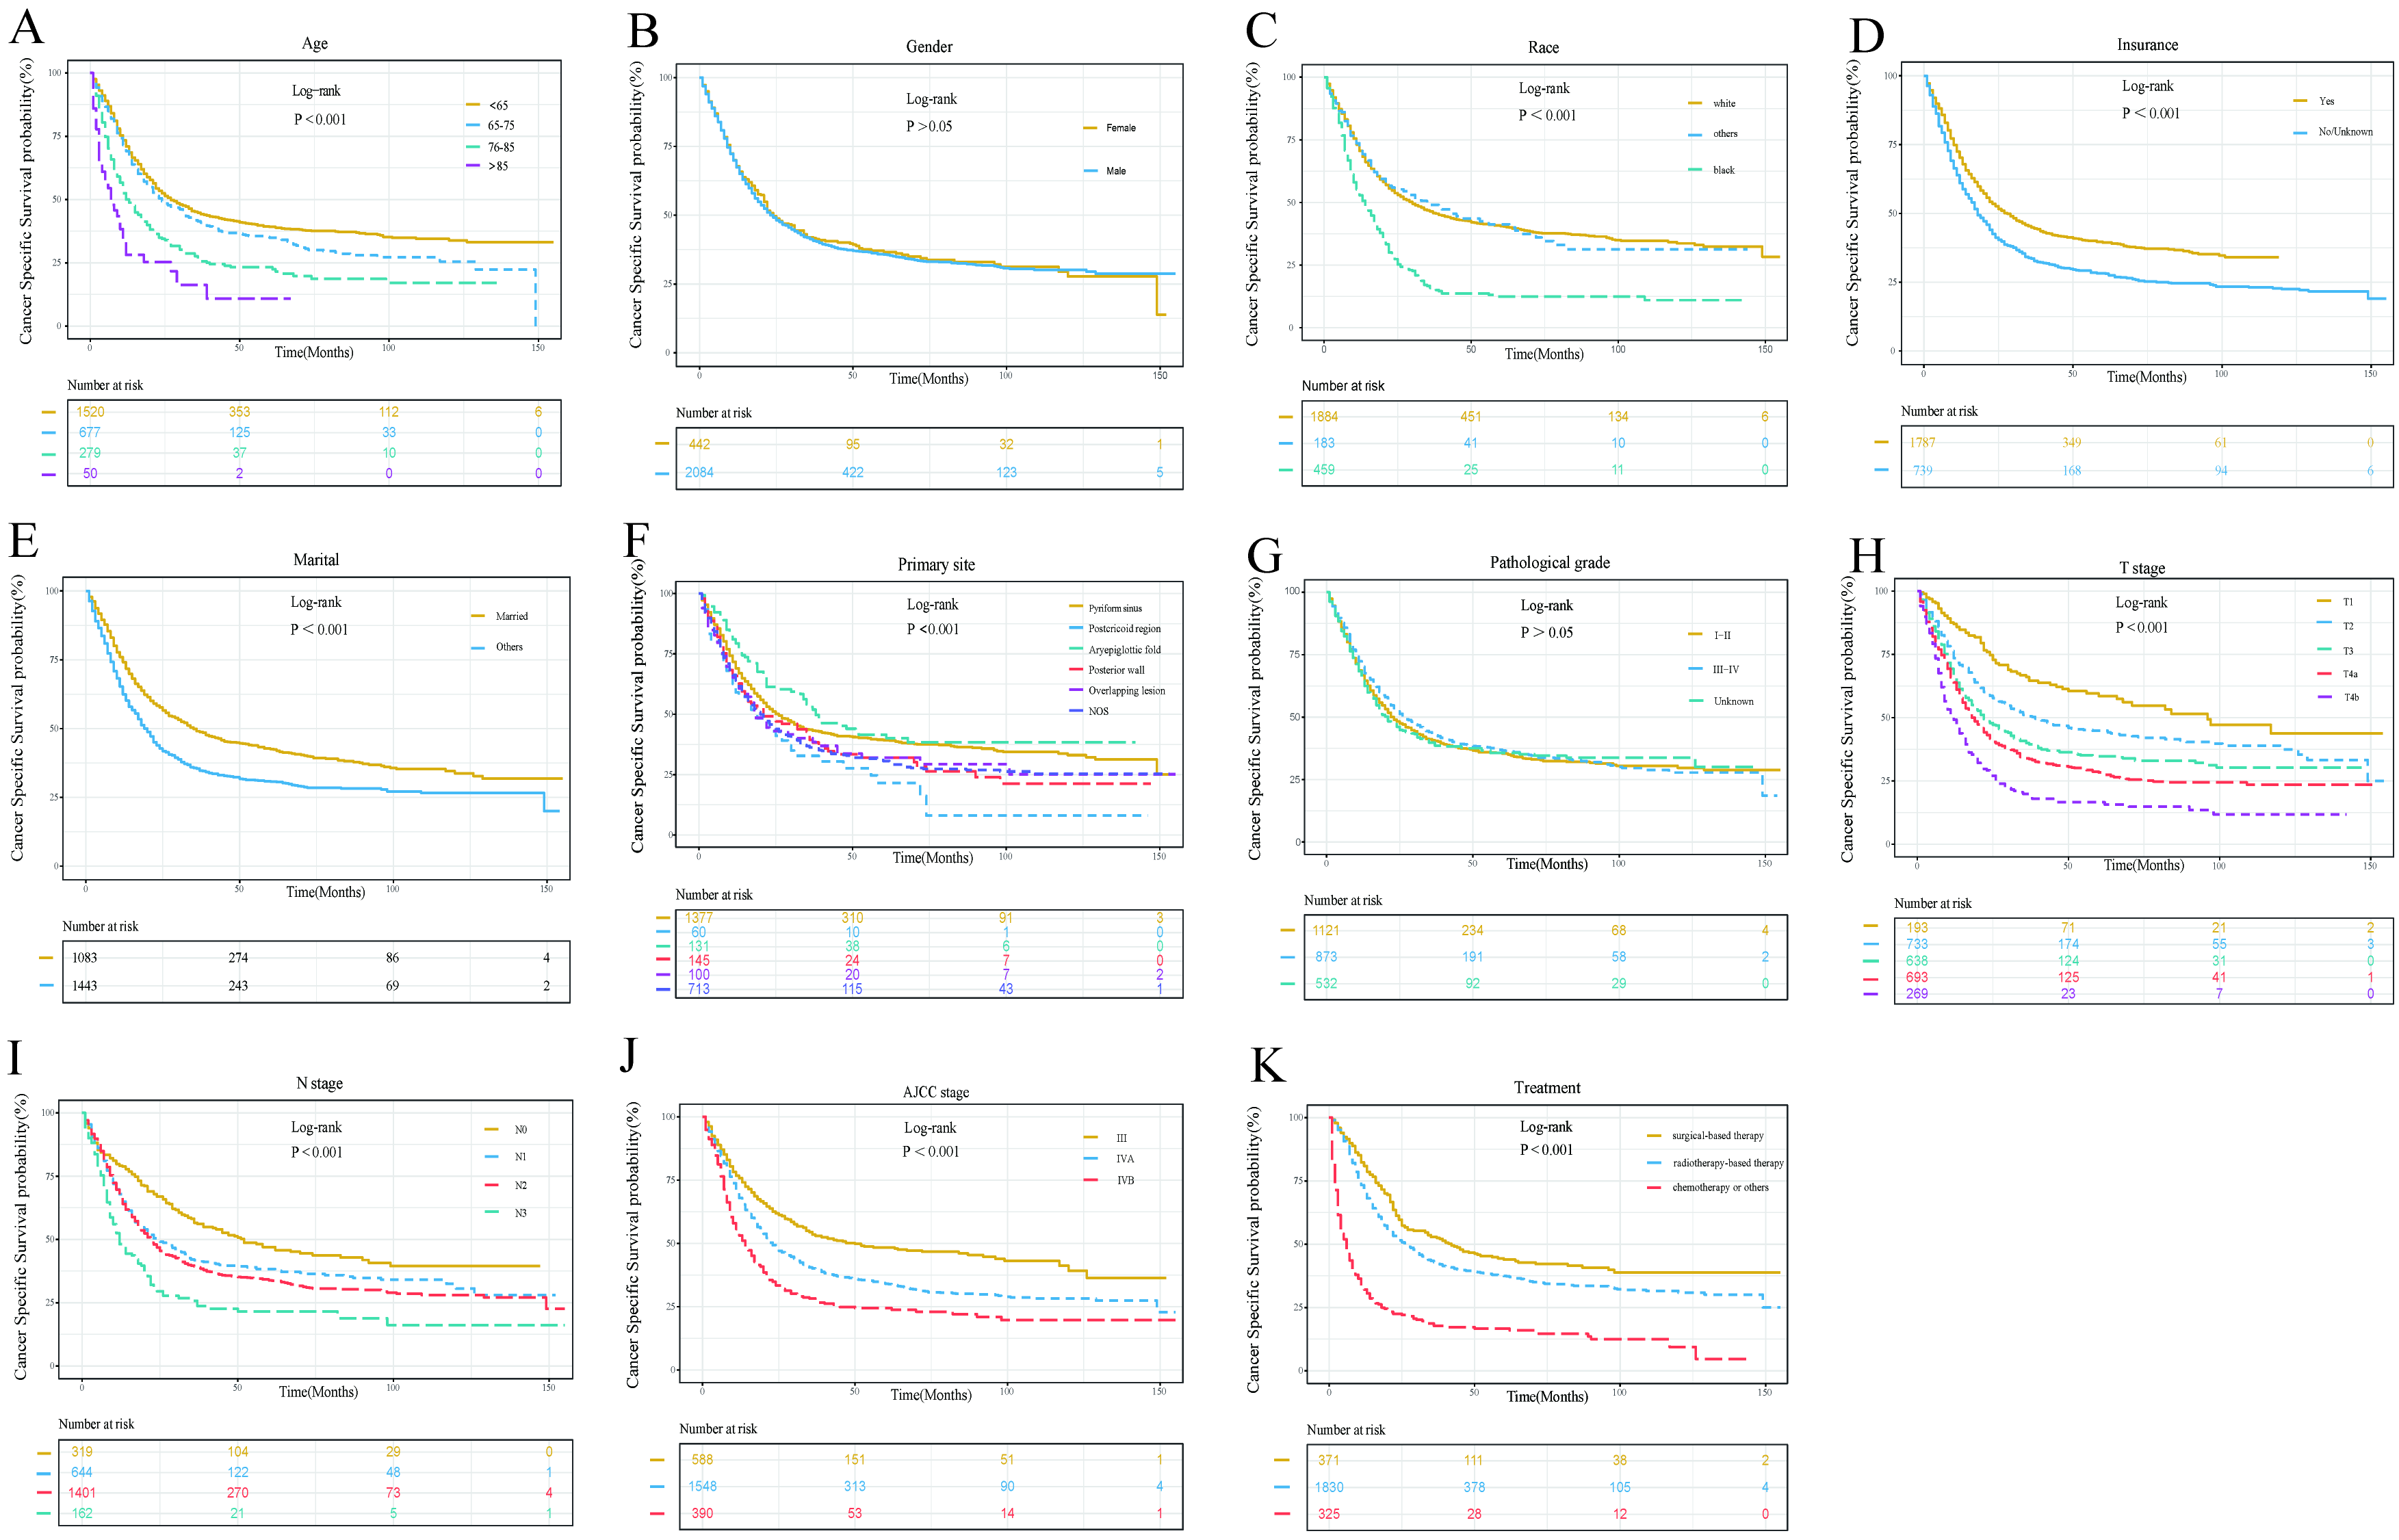


Supplementary Figure 3. Kaplan-Meier Survival Curves for CSS in the total sample.

Supplementary Table 3 Comparison of C-index between Nomogran model and AJCC staging

| **Groups** | **C-index(±SD)** | |
| --- | --- | --- |
| **OS** | **CSS** |
| **Training group** | 0.750±0.025 | 0.709±0.025 |
| The Nomogram model | 0.631±0.029 | 0.639±0.027 |
| The AJCC Staging |  |  |
| **Validation group** | 0.756±0.038 | 0.698±0.038 |
| The Nomogram model | 0.631±0.045 | 0.621±0.040 |
| The AJCC Staging |  |  |
| **External validation group** |  |  |
| The Nomogram model | 0.757±0.061 | — |
| The AJCC Staging | 0.666±0.066 | — |


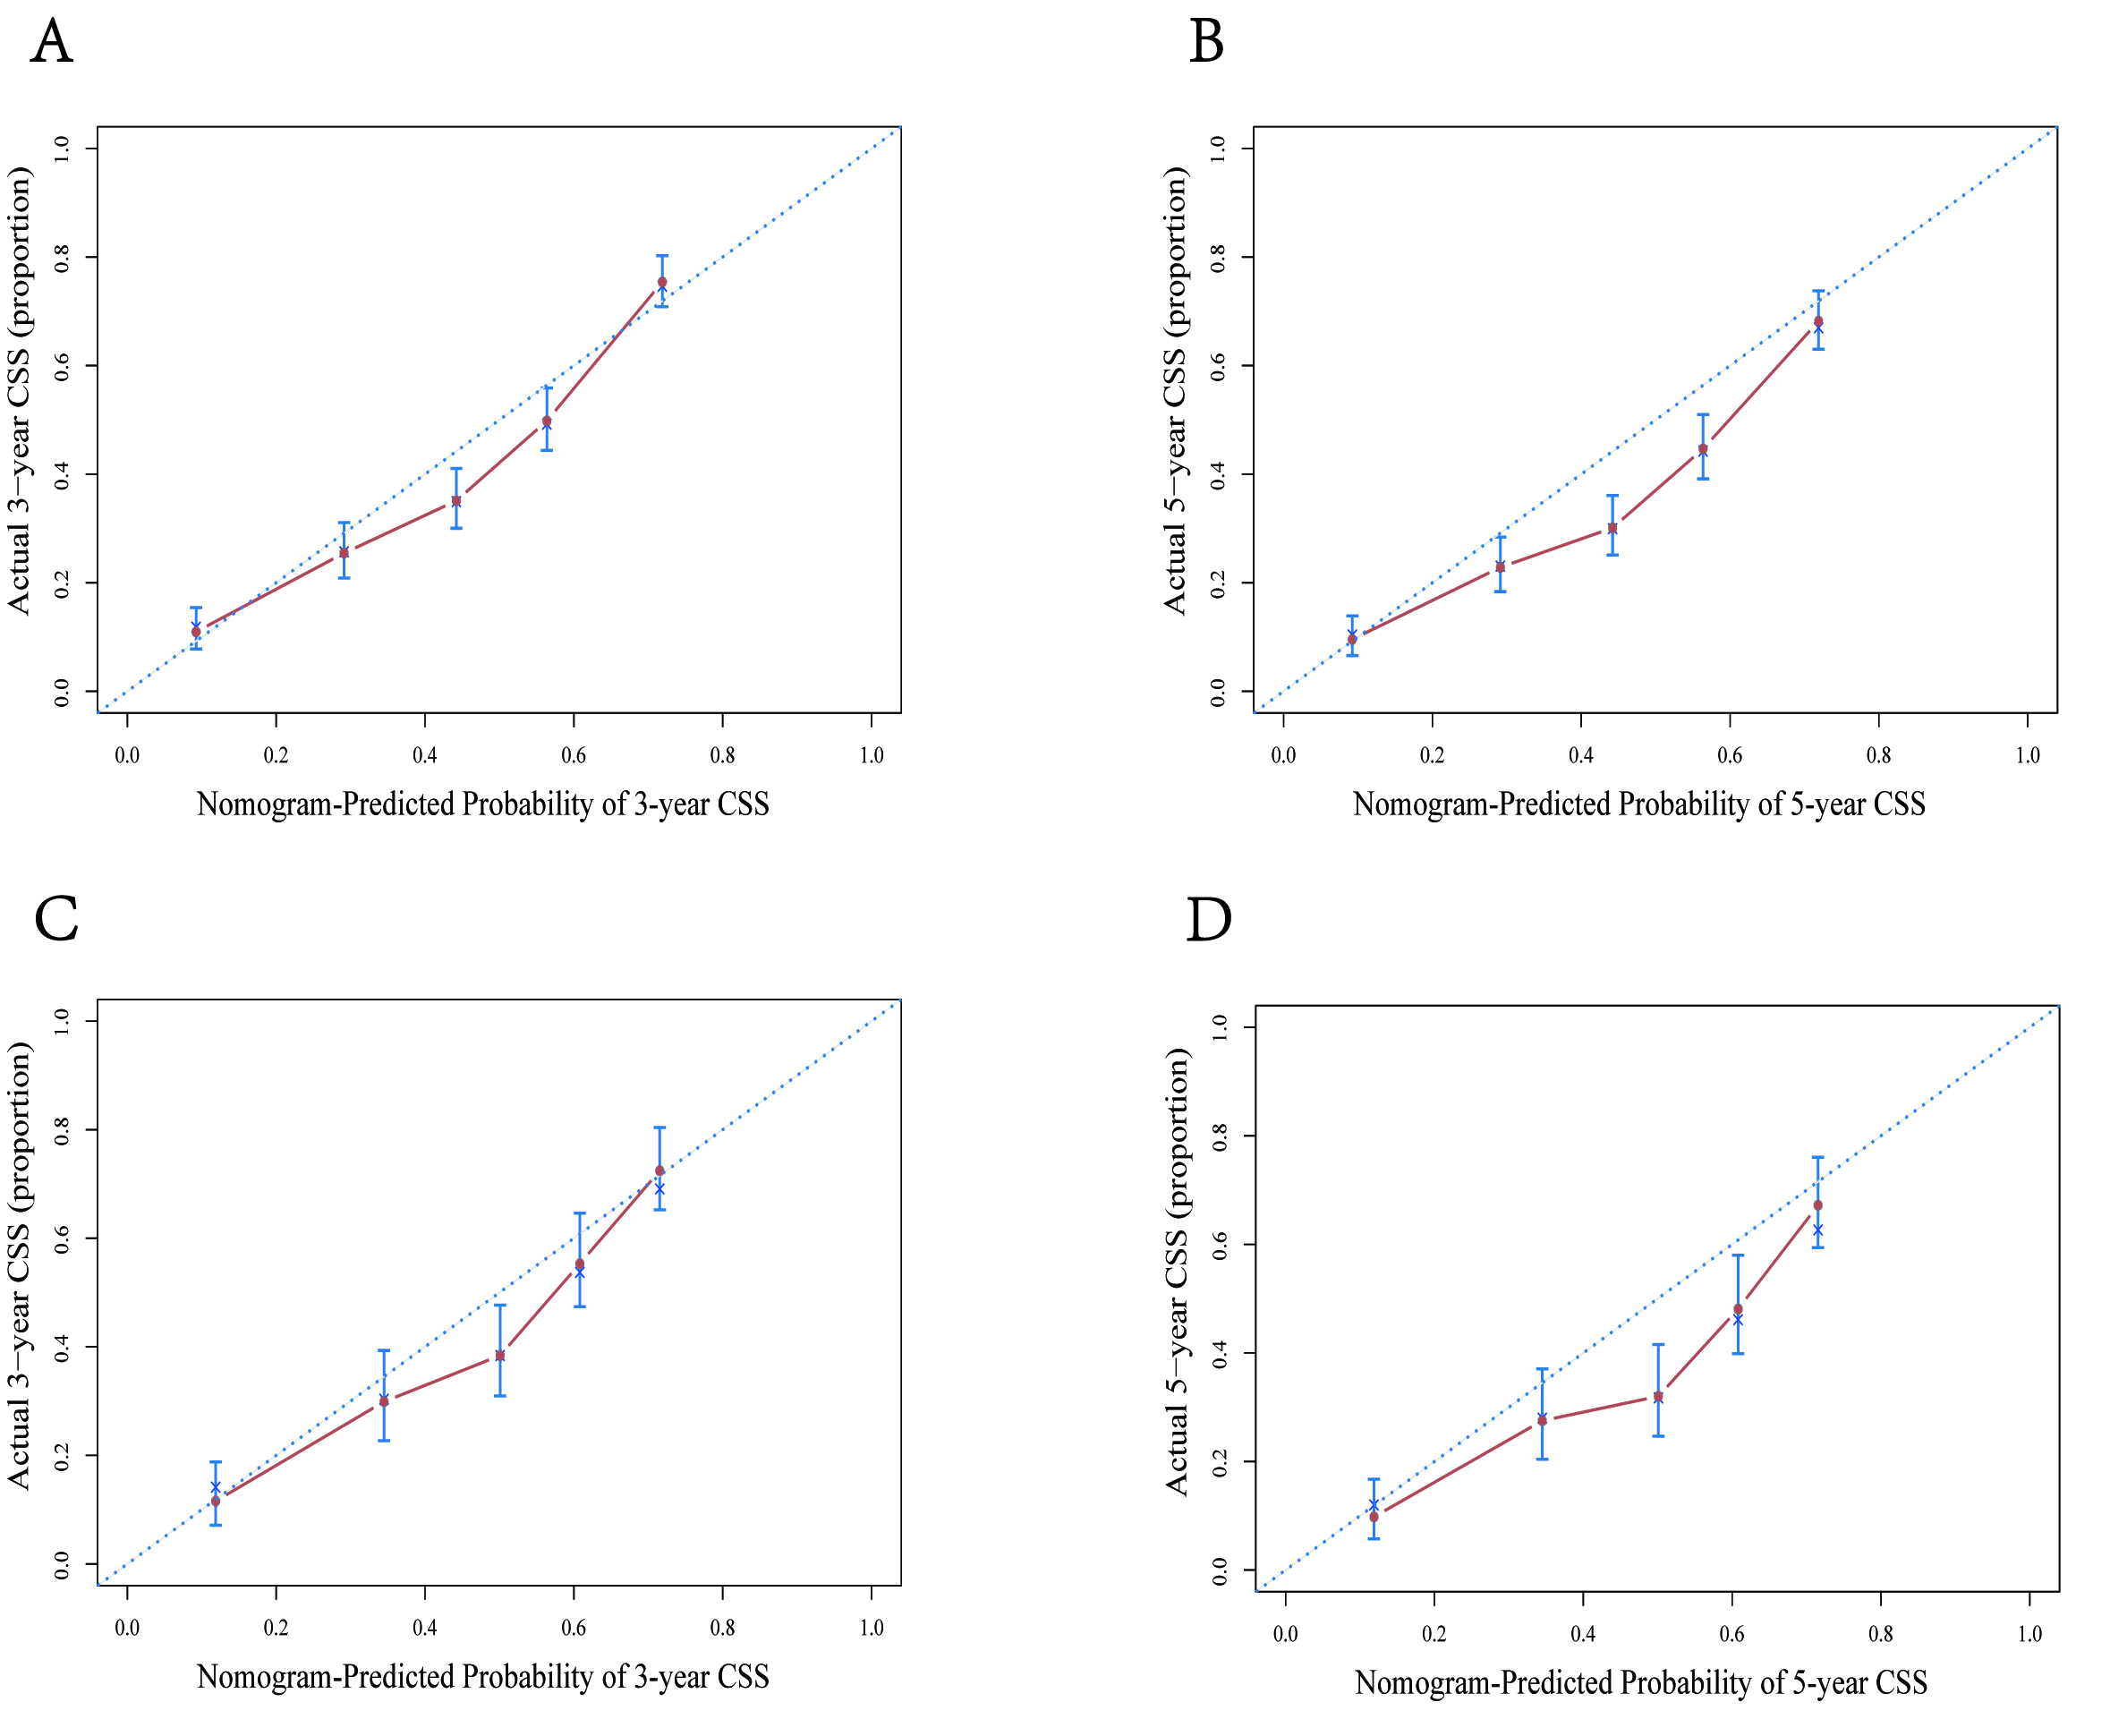


Supplementary Figure 4. The calibration curves predicting 3-, and 5-year CSS in training group (A,B) and validation group (C,D).


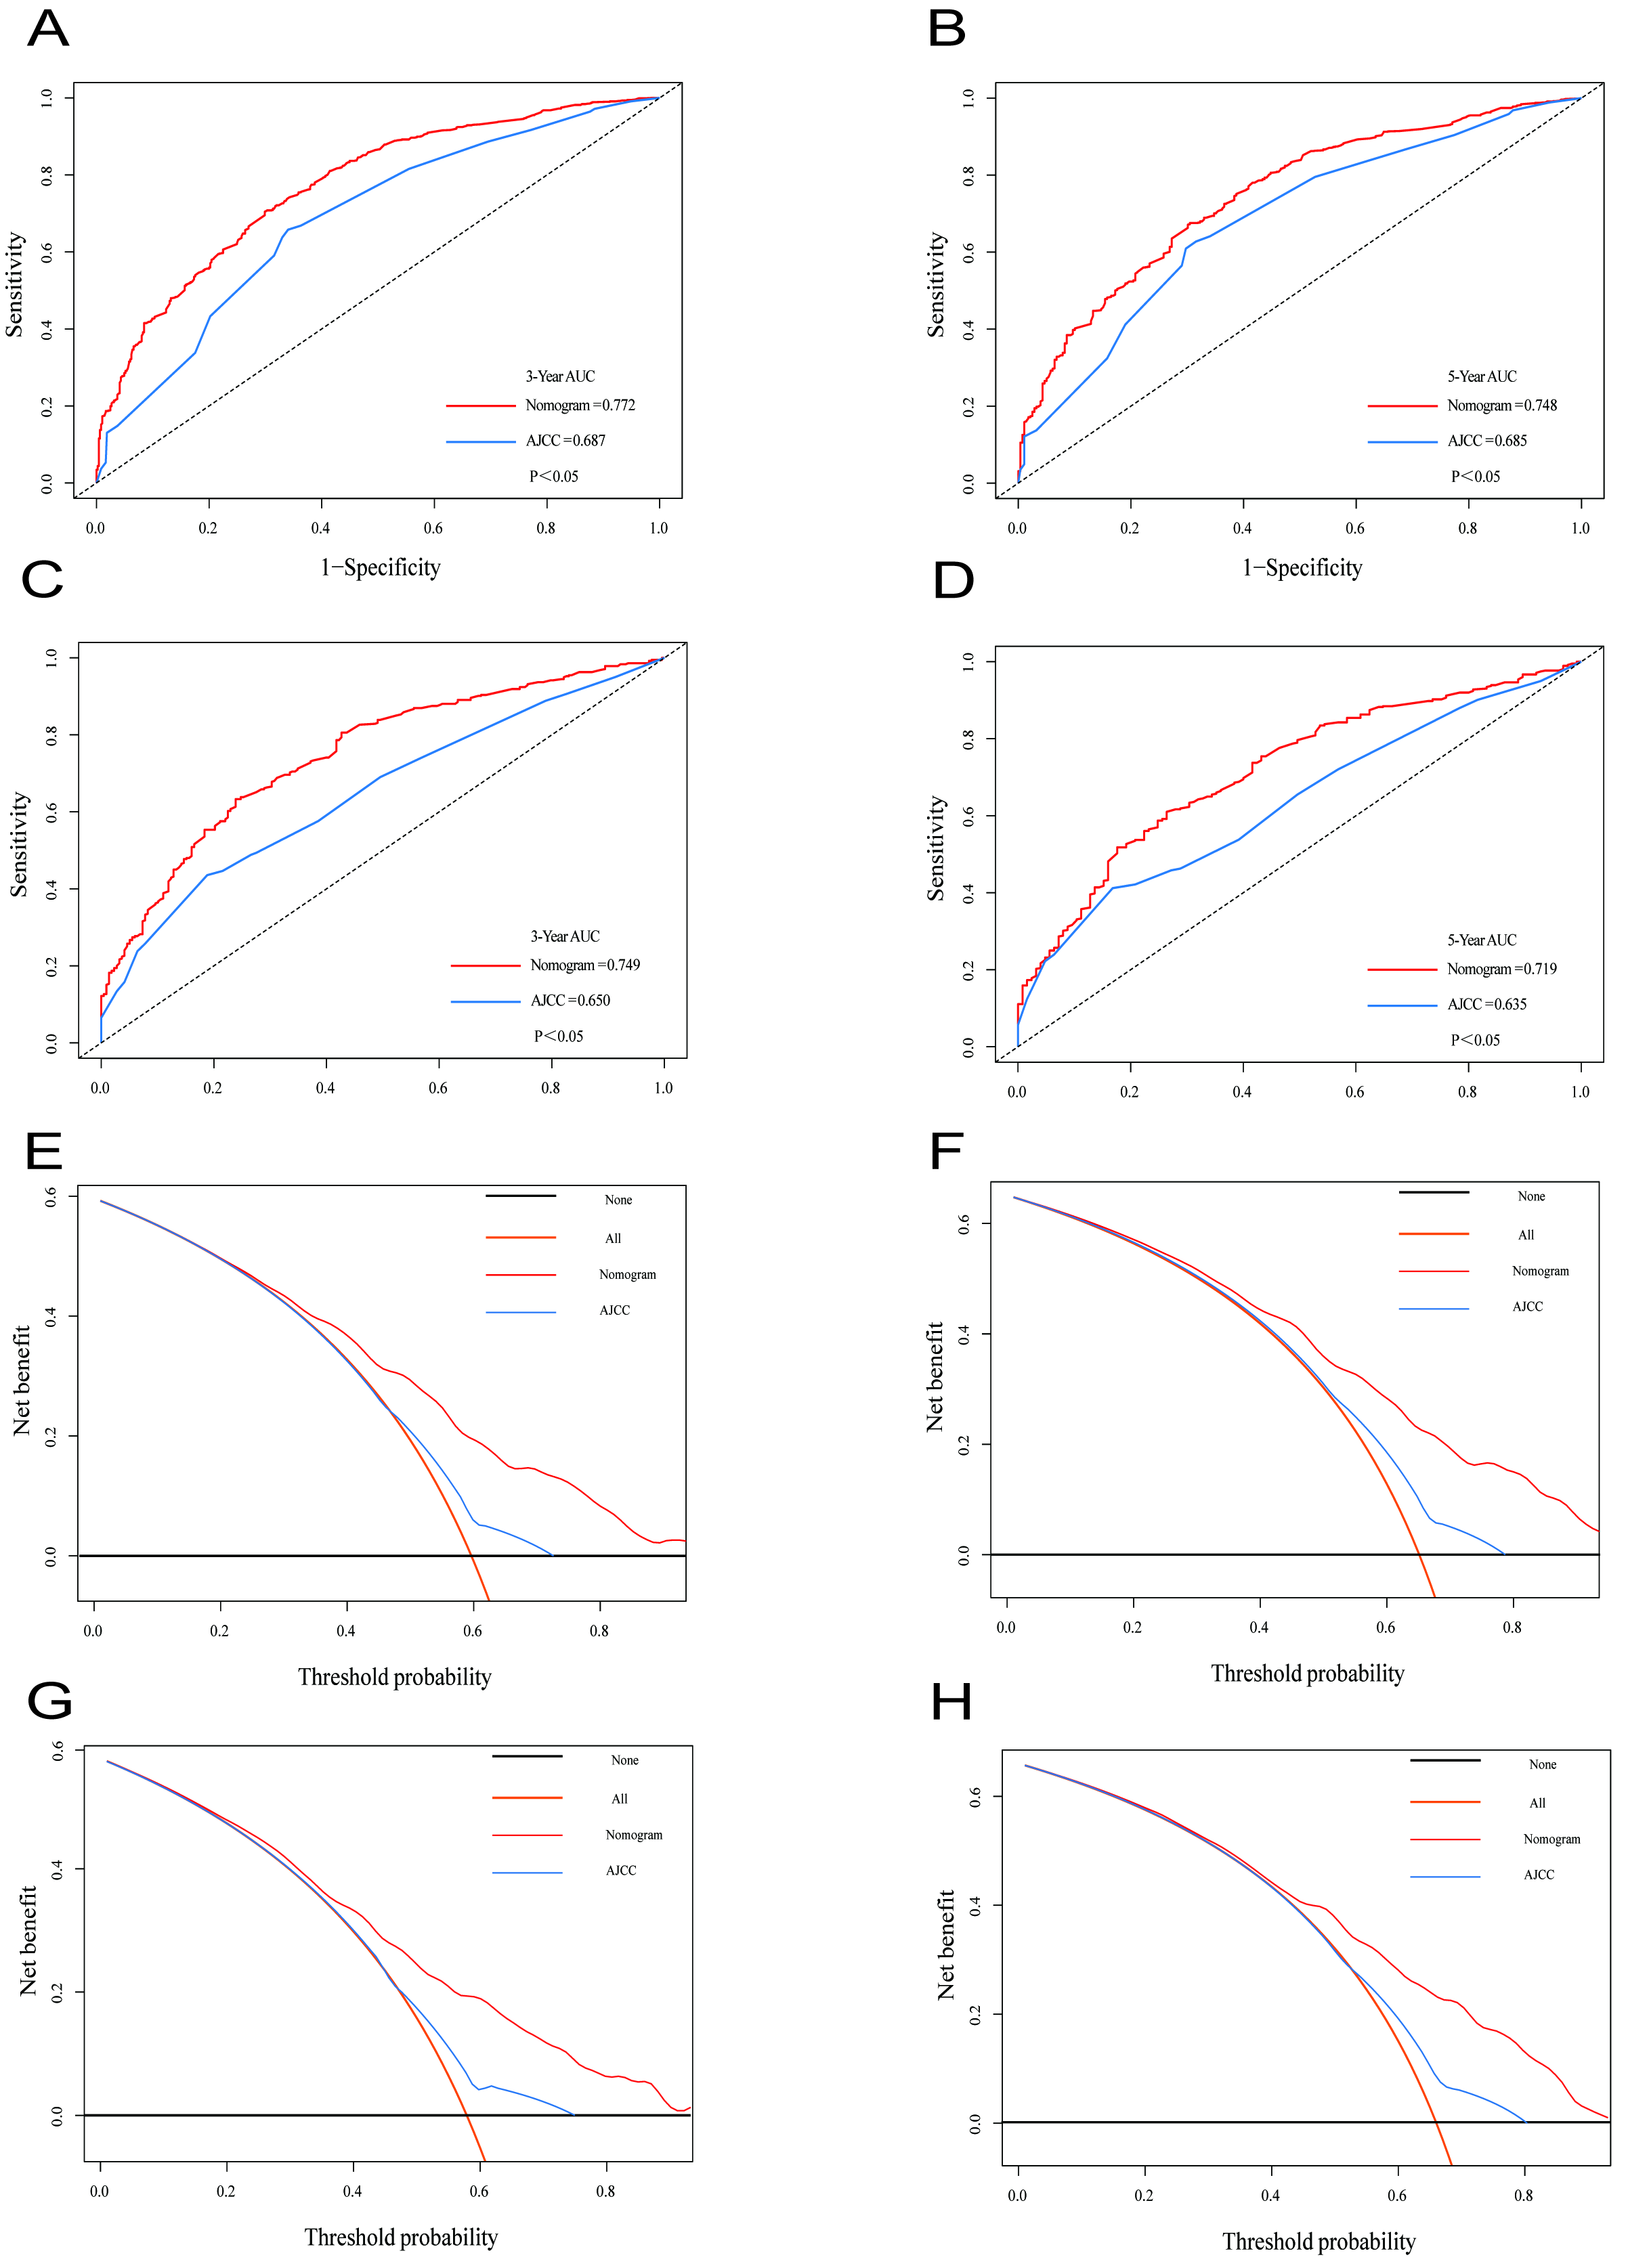


Supplementary Figure 5. The nomogram and the AJCC stage of the Receiver operating characteristic curve analysis in the prediction of CSS at the 3- and 5-year point in the training (A, B), internal validation (C, D) and the Decision curve analysis in the prediction of CSS at the 3- and 5-year point in the training (E, F), internal validation (G, H) groups.


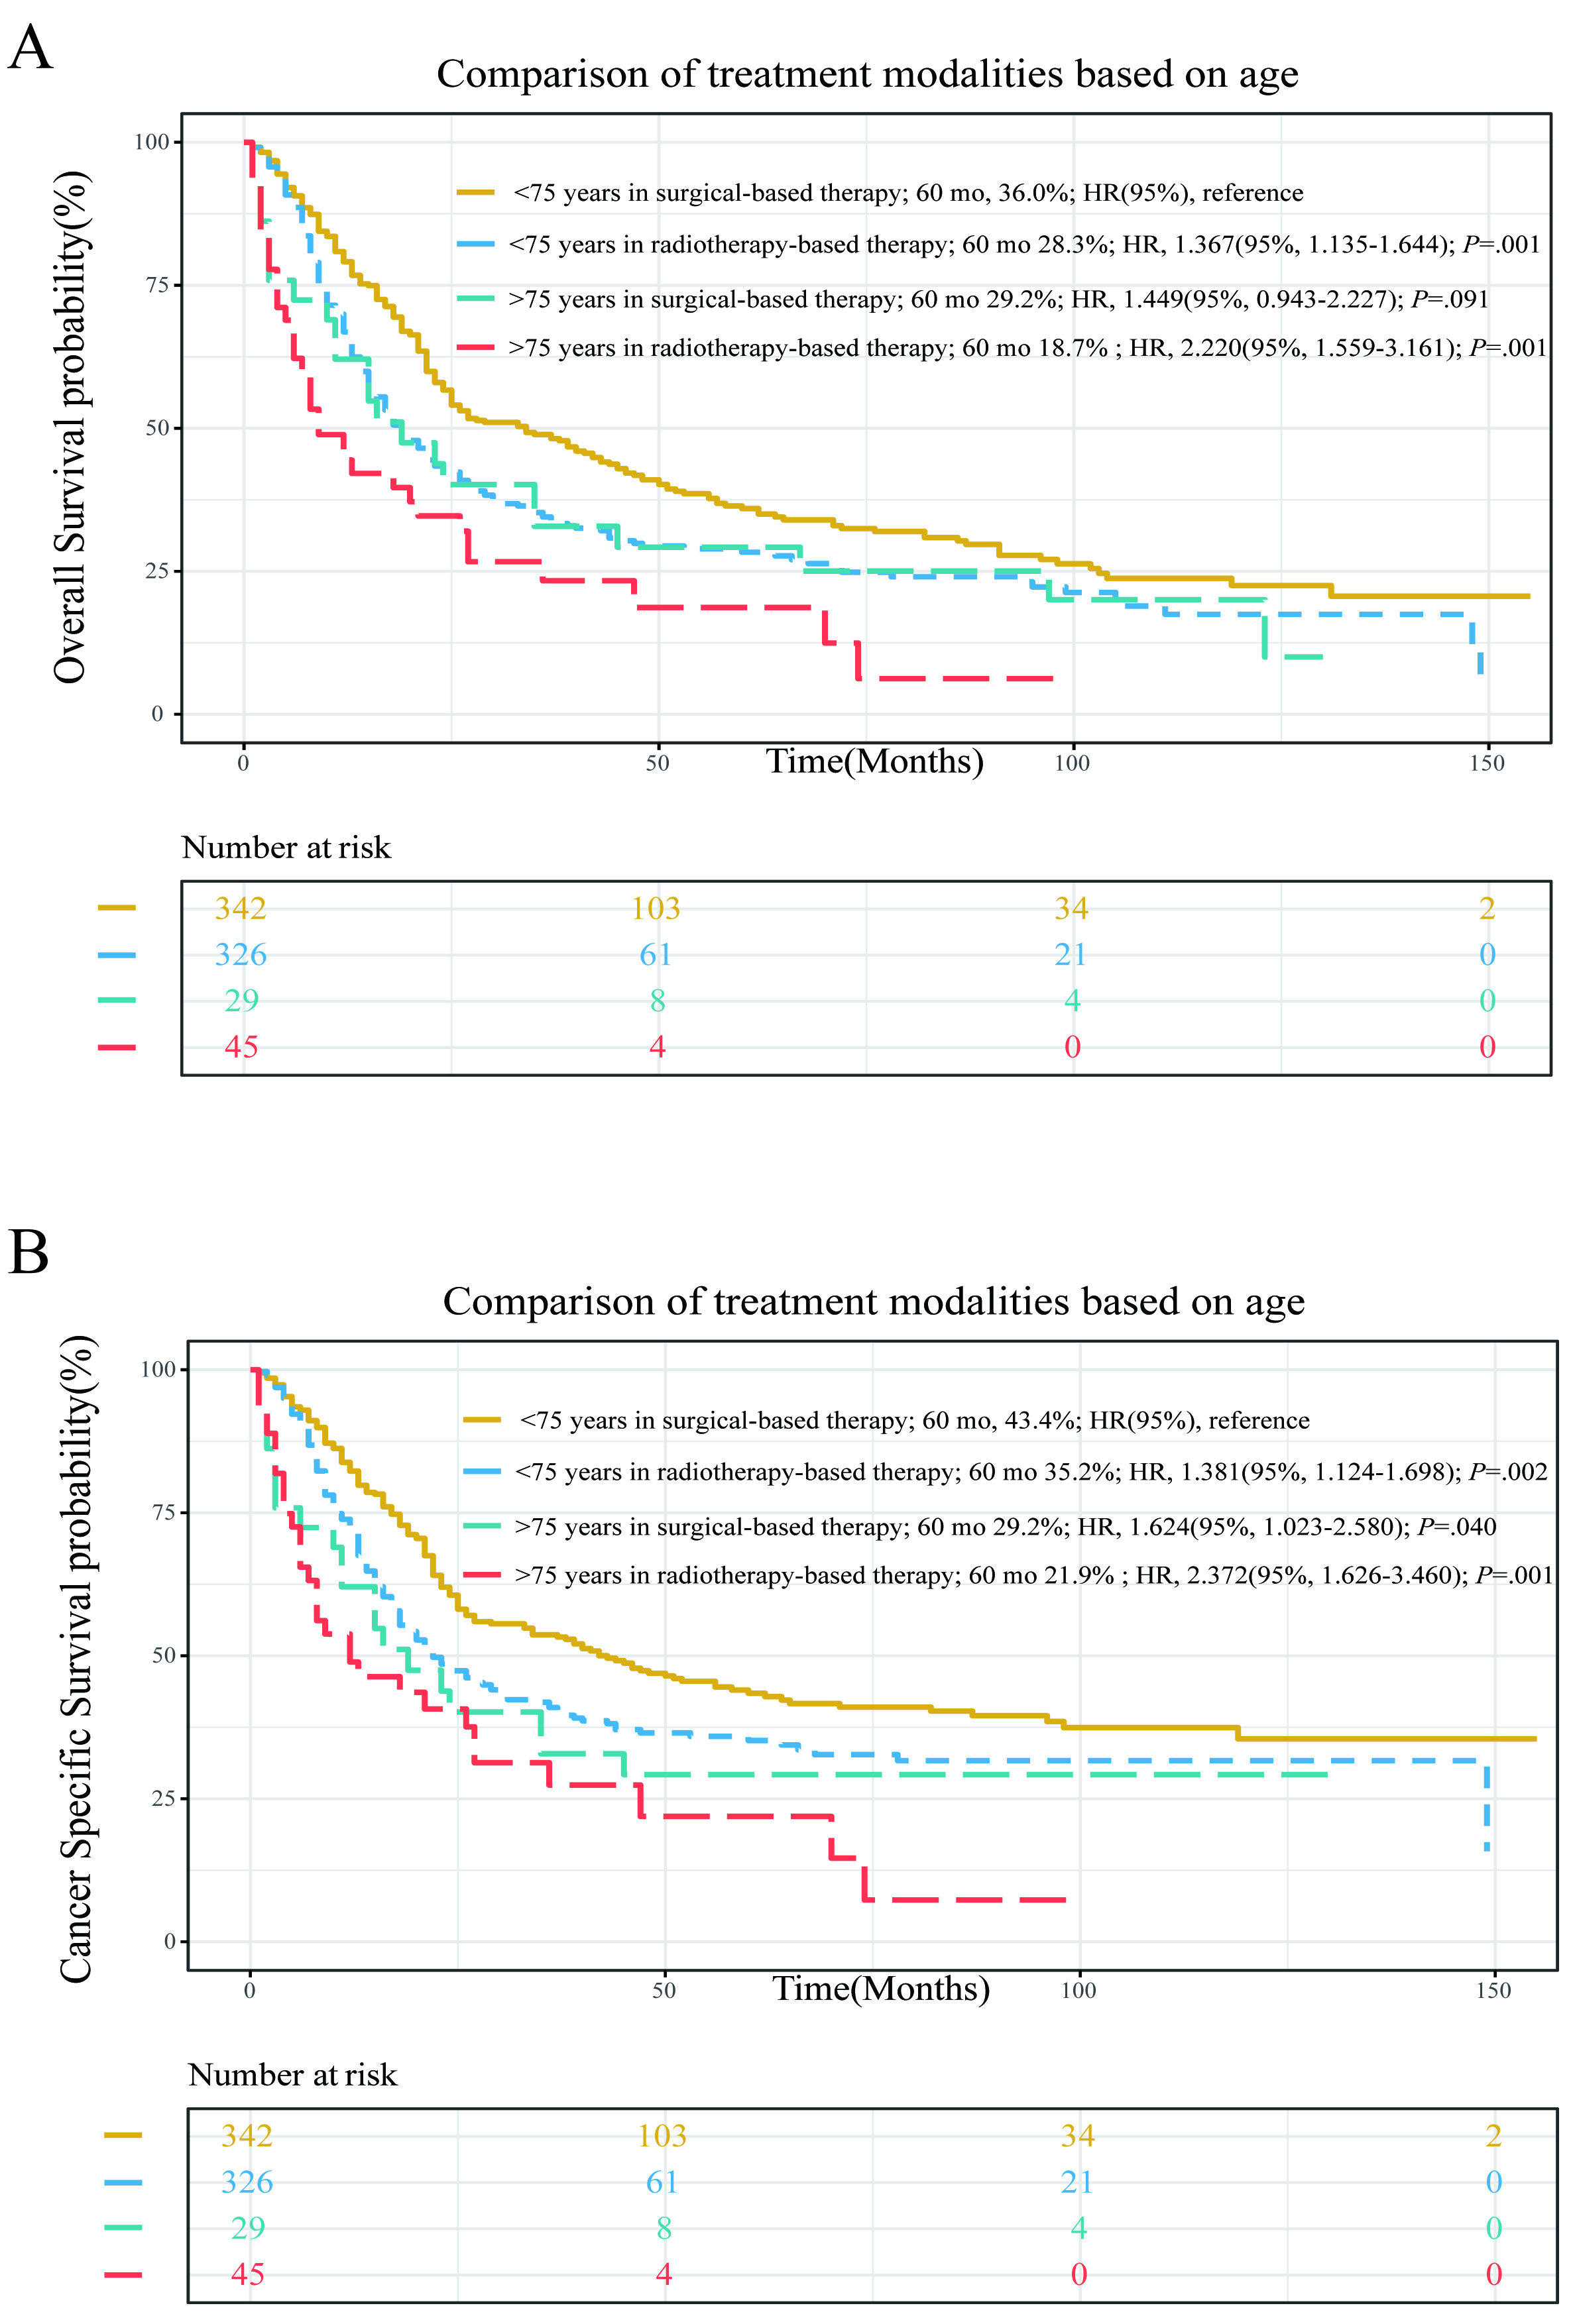


Supplementary Figure 6. Differences in OS (A) and CSS (B) by treatment modality based on age.

Supplementary Table 4.Propensity-matched score analysis of Surgical-based vs Radiotherapy-based therapy

|  | Unmatched | | *P value* | Matched | | *P value* |
| --- | --- | --- | --- | --- | --- | --- |
| Characteristics | Surgery-based | Radiotherapy-based | Surgery-based | Radiotherapy-based |
| N=371 | N=1830 | N=371 | N=371 |
| **Age** |  |  | 0.676 |  |  | 0.568 |
| <65 | 244(65.8%) | 1097(60.0%) |  | 244(65.8%) | 255(68.7%) |  |
| 65-75 | 98(26.4%) | 494(27.0%) |  | 98(26.4%) | 71(19.1%) |  |
| 76-85 | 25(6.7%) | 204(11.1%) |  | 25(6.7%) | 37(10.0%) |  |
| >85 | 4(1.1%) | 35(1.9%) |  | 4(1.1%) | 8(2.2%) |  |
| **Gender** |  |  | 0.704 |  |  | 0.393 |
| Male | 314(84.6%) | 1505(82.2%) |  | 314(84.6%) | 333(89.8%) |  |
| Female | 57(15.4%) | 325(17.8%) |  | 57(15.4%) | 38(10.2%) |  |
| **Race** |  |  | 0.731 |  |  | 0.675 |
| White | 290(78.2%) | 1369(74.8%) |  | 290(78.2%) | 285(76.8%) |  |
| Black | 51(13.7%) | 338(18.5%) |  | 51(13.7%) | 65(17.5%) |  |
| Others | 30(8.1%) | 123(6.7%) |  | 30(8.1%) | 21(5.7%) |  |
| **Insurance** |  |  | 0.807 |  |  | 0.606 |
| Yes | 258(69.5%) | 1244(67.9%) |  | 258(69.5%) | 255(72.8%) |  |
| No/Unknown | 113(30.5%) | 586(32.1%) |  | 113(30.5%) | 101(27.2%) |  |
| **Marital status** |  |  | 0.818 |  |  | 0.593 |
| Married | 155(41.8%) | 735(40.2%) |  | 155(41.8%) | 141(38.1%) |  |
| Others | 216(58.2%) | 1095(59.8%) |  | 216(58.2%) | 230(61.9%) |  |
| **Primary site** |  |  | 0.657 |  |  | 0.843 |
| Pyriform sinus | 227(61.2%) | 991(54.2%) |  | 227(61.2%) | 204(55.0%) |  |
| Postcricoid region | 4(1.1%) | 47(2.6%) |  | 4(1.1%) | 9(2.4%) |  |
| Aryepiglottic fold | 23(6.2%) | 94(5.1%) |  | 23(6.2%) | 18(4.9%) |  |
| Posterior wall | 11(3.0%) | 119(6.5%) |  | 11(3.0%) | 23(6.2%) |  |
| Overlapping lesion | 15(4.0%) | 70(3.8%) |  | 15(4.0%) | 12(3.2%) |  |
| NOS | 91(24.5%) | 509(27.8%) |  | 91(24.5%) | 105(28.3%) |  |
| **Pathological grade** |  |  | 0.016 |  |  | 0.682 |
| I-II | 168(45.3%) | 815(44.5%) |  | 168(45.3%) | 150(40.4%) |  |
| III-IV | 170(45.8%) | 598(32.7%) |  | 170(45.8%) | 178(48.0%) |  |
| Unknown | 33(8.9%) | 417(22.8%) |  | 33(8.9%) | 43(11.6%) |  |
| **T stage** |  |  | 0.036 |  |  | 0.454 |
| T1 | 49(13.2%) | 123(6.7%) |  | 49(13.2%) | 34(9.2%) |  |
| T2 | 82(22.1%) | 568(31.1%) |  | 82(22.1%) | 90(24.3%) |  |
| T3 | 65(17.5%) | 505(27.6%) |  | 65(17.5%) | 69(18.6%) |  |
| T4a | 149(40.2%) | 449(24.5%) |  | 149(40.2%) | 125(33.6%) |  |
| T4b | 26(7.0%) | 185(10.1%) |  | 26(7.0%) | 53(14.3%) |  |
| **N stage** |  |  | 0.551 |  |  | 0.274 |
| N0 | 38(10.2%) | 237(13.0%) |  | 38(10.2%) | 50(13.5%) |  |
| N1 | 73(19.7%) | 486(26.5%) |  | 73(19.7%) | 92(24.8%) |  |
| N2 | 237(63.9%) | 998(54.5%) |  | 237(63.9%) | 190(51.2%) |  |
| N3 | 23(6.2%) | 109(6.0%) |  | 23(6.2%) | 39(10.5%) |  |
| **AJCC stage** |  |  | 0.067 |  |  | 0.132 |
| III | 51(13.7%) | 469(25.7%) |  | 51(13.7%) | 79(21.3%) |  |
| IVa | 274(73.9%) | 1093(59.7) |  | 274(73.9%) | 224(60.4%) |  |
| IVb | 46(12.4%) | 268(14.6%) |  | 46(12.4%) | 68(18.3%) |  |

Supplementary Table 5. Propensity-matched score analysis of RT vs RCT

|  | Unmatched | | *P value* | Matched | | *P value* |
| --- | --- | --- | --- | --- | --- | --- |
| Characteristics | RT | CRT | RT | CRT |
| N=267 | N=1563 | N=261 | N=261 |
| **Age** |  |  | 0.001 |  |  | 0.865 |
| <65 | 112(42.0%) | 985(63.1%) |  | 112(42.9%) | 100(38.3%) |  |
| 65-75 | 72(27.0%) | 422(27.0%) |  | 72(27.6%) | 81(31.0%) |  |
| 76-85 | 61(22.8%) | 143(9.1%) |  | 61(23.4%) | 68(26.1%) |  |
| >85 | 22(8.2%) | 13(0.8%) |  | 16(6.1%) | 12(4.6%) |  |
| **Gender** |  |  | 0.476 |  |  | 0.404 |
| Male | 209(78.3%) | 1296(82.9%) |  | 206(78.9%) | 193(73.9%) |  |
| Female | 58(21.7%) | 267(17.1%) |  | 55(21.1%) | 68(26.1%) |  |
| **Race** |  |  | 0.846 |  |  | 0.173 |
| White | 194(72.7%) | 1175(75.2%) |  | 191(73.2%) | 164(62.8%) |  |
| Black | 57(21.3%) | 281(18.0%) |  | 56(21.5%) | 69(26.5%) |  |
| Others | 16(6.0%) | 107(6.8%) |  | 14(5.3%) | 28(10.7%) |  |
| **Insurance** |  |  | 0.563 |  |  | 0.658 |
| Yes | 195(73.1%) | 1085(69.4%) |  | 193(73.9%) | 200(76.6%) |  |
| No/Unknown | 72(26.9%) | 478(30.6) |  | 68(26.1) | 61(23.4%) |  |
| **Marital status** |  |  | 0.802 |  |  | 0.361 |
| Married | 114(42.6%) | 697(44.6%) |  | 105(40.3%) | 122(46.7%) |  |
| Others | 153(57.3%) | 866(55.4%) |  | 156(59.7%) | 139(53.3%) |  |
| **Primary site** |  |  | 0.876 |  |  | 0.205 |
| Pyriform sinus | 155(58.1%) | 836(53.5%) |  | 151(57.9%) | 142(54.4%) |  |
| Postcricoid region | 10(3.7%) | 37(2.4%) |  | 10(3.8%) | 2(0.8%) |  |
| Aryepiglottic fold | 14(5.2%) | 80(5.1%) |  | 14(5.4%) | 22(8.4%) |  |
| Posterior wall | 17(6.4%) | 102(6.5%) |  | 17(6.5%) | 37(14.2%) |  |
| Overlapping lesion | 9(3.4%) | 61(3.9%) |  | 9(3.4%) | 15(5.7%) |  |
| NOS | 62(23.2%) | 447(28.6%) |  | 60(23.0%) | 43(16.5%) |  |
| **Pathological grade** |  |  | 0.558 |  |  | 0.495 |
| I-II | 128(47.9%) | 687(44.0%) |  | 124(47.5%) | 121(46.4%) |  |
| III-IV | 71(26.6%) | 527(33.7%) |  | 70(26.8%) | 87(33.3%) |  |
| Unknown | 68(25.5%) | 349(22.3%) |  | 67(25.7%) | 53(20.3%) |  |
| **T stage** |  |  | 0.988 |  |  | 0.474 |
| T1 | 17(6.4%) | 106(6.8%) |  | 17(6.5%) | 5(1.9%) |  |
| T2 | 77(28.8%) | 491(31.4%) |  | 75(28.7%) | 68(26.1%) |  |
| T3 | 76(28.5%) | 429(27.4%) |  | 73(28.0%) | 87(33.3%) |  |
| T4a | 71(26.6%) | 378(24.2%) |  | 70(26.8%) | 70(26.8%) |  |
| T4b | 26(9.7%) | 159(10.2%) |  | 26(10.0%) | 31(11.9%) |  |
| **N stage** |  |  | 0.291 |  |  | 0.495 |
| N0 | 45(16.9%) | 192(12.3%) |  | 43(16.5%) | 63(24.1%) |  |
| N1 | 88(33.0%) | 398(25.5%) |  | 86(33.0%) | 70(26.8%) |  |
| N2 | 125(46.7%) | 873(55.8%) |  | 123(47.1%) | 123(47.1%) |  |
| N3 | 9(3.4%) | 100(6.4%) |  | 9(3.4%) | 5(2.0%) |  |
| AJCC stage |  |  | 0.514 |  |  | 0.988 |
| III | 86(32.2%) | 383(24.5%) |  | 82(31.4%) | 83(31.8%) |  |
| IVa | 150(56.2%) | 943(60.3%) |  | 148(56.7%) | 146(55.9%) |  |
| IVb | 31(11.6%) | 237(15.2%) |  | 31(11.9%) | 32(12.3%) |  |
